# Supplementary material
Source: PubMed Central journal article supplement (PMC2442923)

**Supplemental Figure 1:**

**Correlation between Hippocampal BDNF Expression and Level of Fear after Extinction**

Scatterplot of extinction performance (%FPS post-extinction) vs. BDNF mRNA expression in dentate gyrus (DG) reveals a significant negative correlation, consistent with more robust extinction of fear with more BDNF mRNA expression. LV-Cre infected animals are represented with a diamond (N=13), LV-GFP animals with a square (N=14).

**Supplemental Figure 2:**

**Correlation between Extinction of Fear and Spatial Learning**

Scatterplot of Morris Water Maze performance (latency in session 5) vs. extinction performance (%FPS post-extinction) reveals a significant positive correlation, such that enhanced extinction in animals with less impaired spatial memory deficits. LV-Cre infected animals are represented with a diamond (N=13), LV-GFP animals with a square (N=14).

## Supplementary Figure 2

### Extinction and Spatial Learning

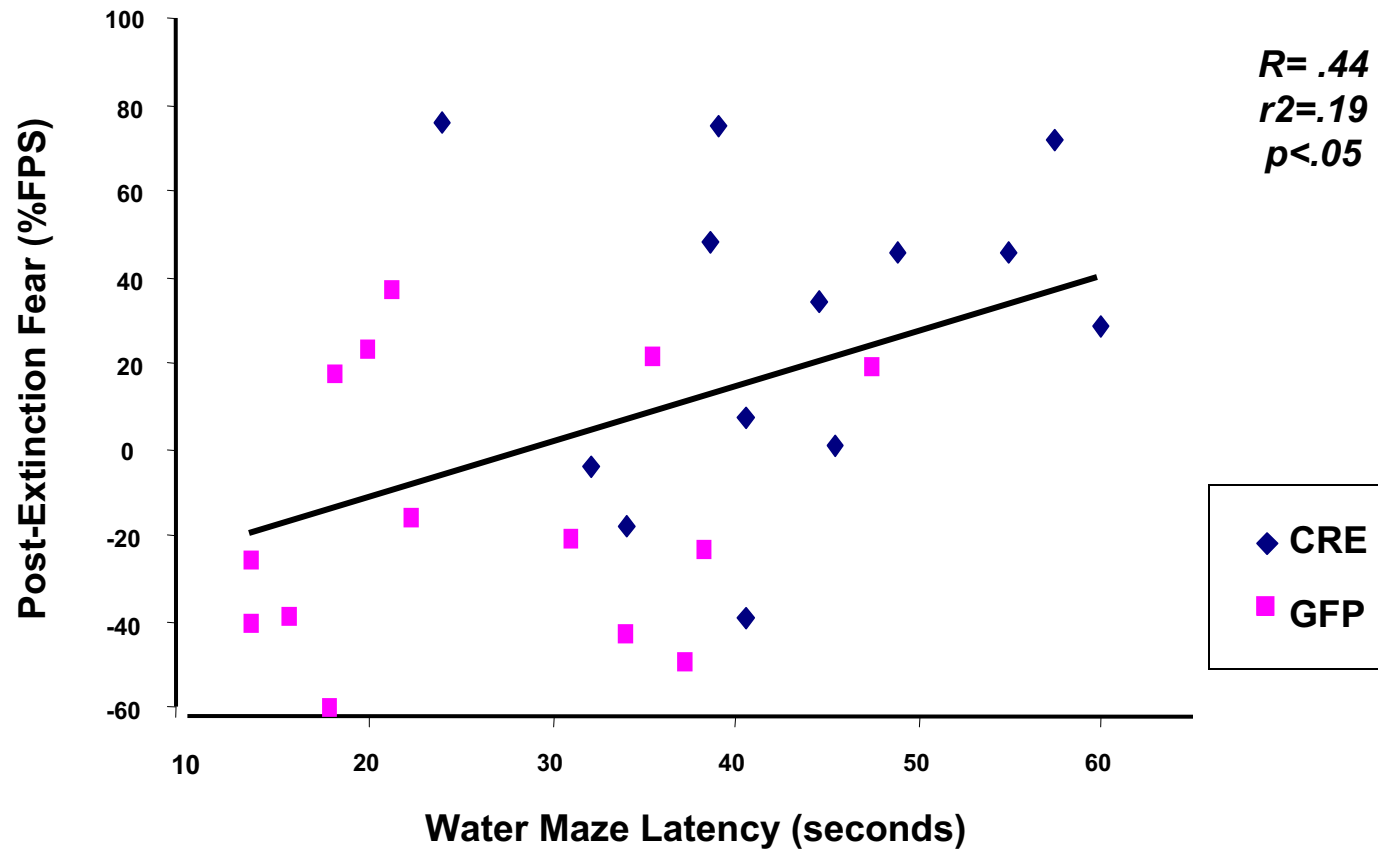

# Supplementary Figure 1

## BDNF and Post-Extinction Fear

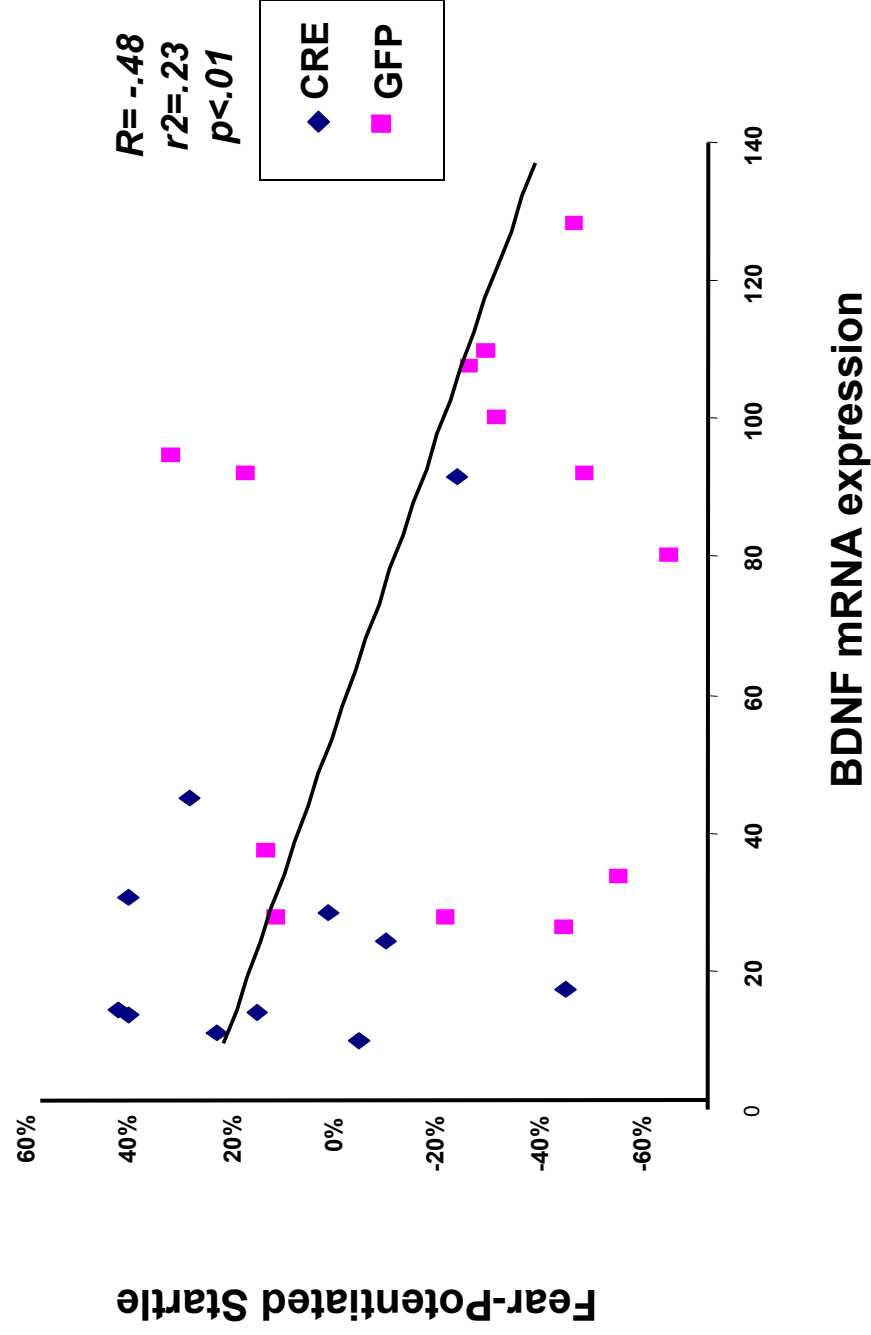

Supplement: NIHMS55848-supplement-supplement_1.pdf [file NIHMS55848-supplement-supplement_1.pdf]
